# Supplementary material for: Bottom-up molecular-assembly of Ru(ii)polypyridyl complex-based hybrid nanostructures decorated with silver nanoparticles: effect of Ag nitrate concentration
Source: Royal Society of Chemistry journal article supplement (doi:10.1039/c4ra01347f), 2014-01-01
Supplement: c4ra01347f1.pdf [file c4ra01347f1.pdf]

## Electronic Supporting Information (ESI)

### Bottom-up molecular assembly of Ru(II)polypyridyl complex-based hybrid nanostructures decorated with silver nanoparticles: Ag nitrate concentration effect

Narayanasamy Vilvamani<sup>a</sup>, Tarkeshwar Gupta<sup>a</sup>, Rinkoo Devi Gupta<sup>b\*</sup>, and Satish Kumar Awasthi<sup>a\*</sup>

<sup>a</sup> Chemical Biology Laboratory, Department of Chemistry, University of Delhi, Delhi-100 007, India.

<sup>b</sup> Faculty of Life Sciences and Biotechnology, South Asian University, New Delhi-110021, India.

Fig. S1 TEM of Ru(II)-Ag I hybrid misfolded sheets

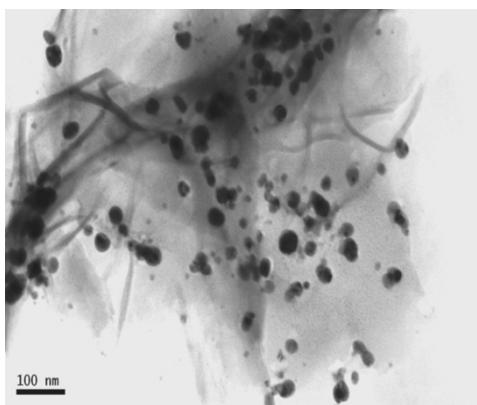

Fig. S2 TEM and electron diffraction (ED) of Ru(II)-Ag III hybrid nanotubes (HNTs)

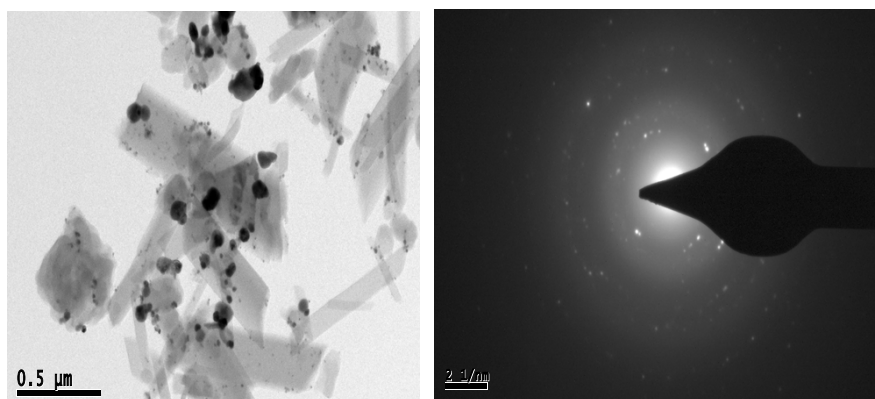

Fig. S3 TEM and ED of Ru(II)- Ag IV HNTs

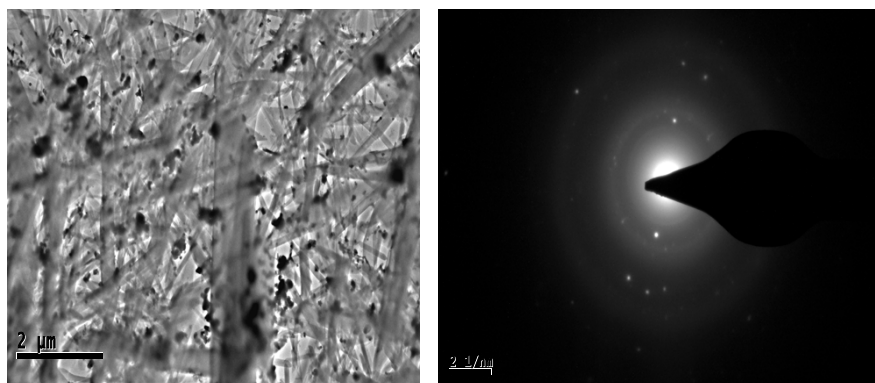

Fig. S4 TEM and ED of Ru(II)- Ag V HNTs

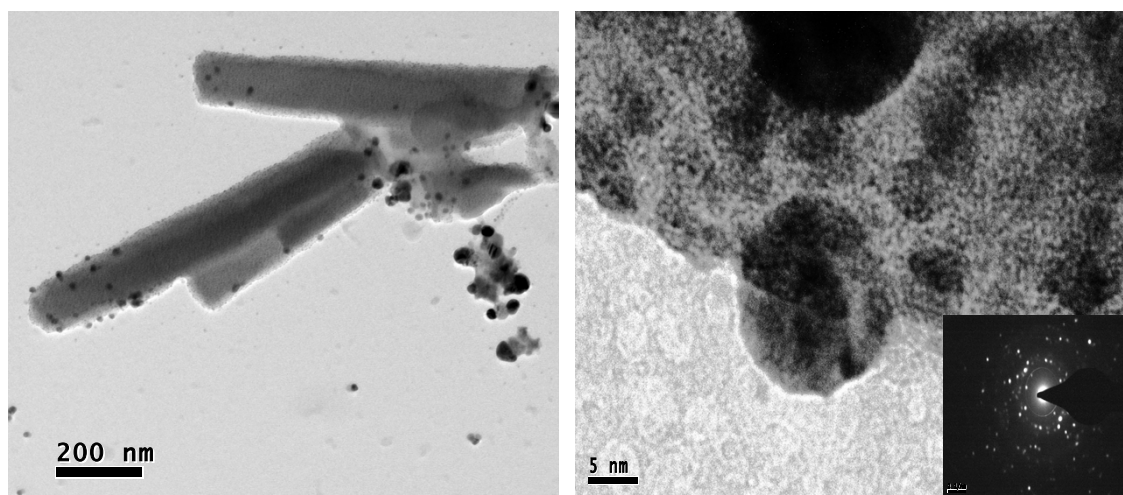

Fig. S5 TEM and ED of Ru(II)-Ag VI wider HNTs

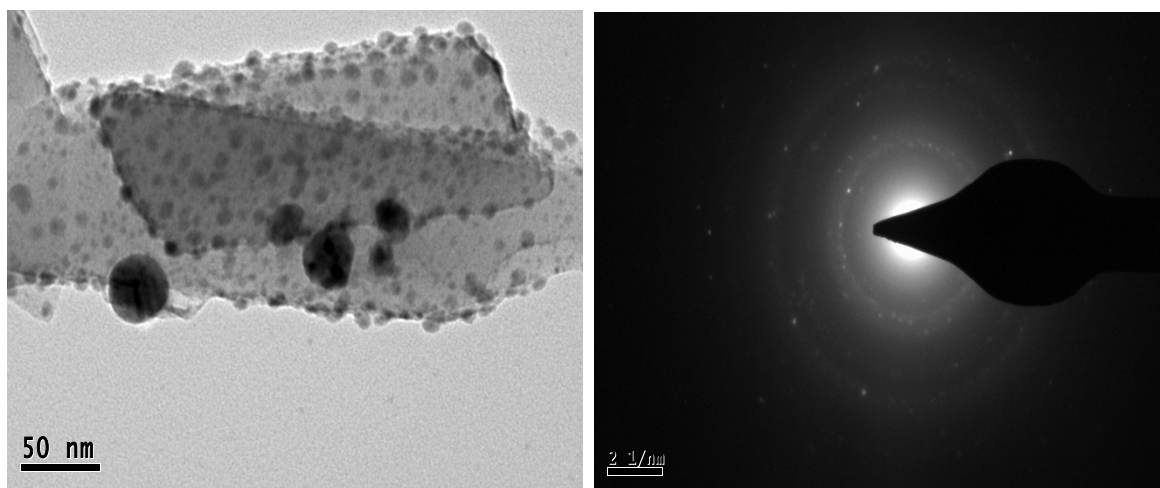

Fig. S6 TEM and ED of citrate capped Ag NPs with nanorod

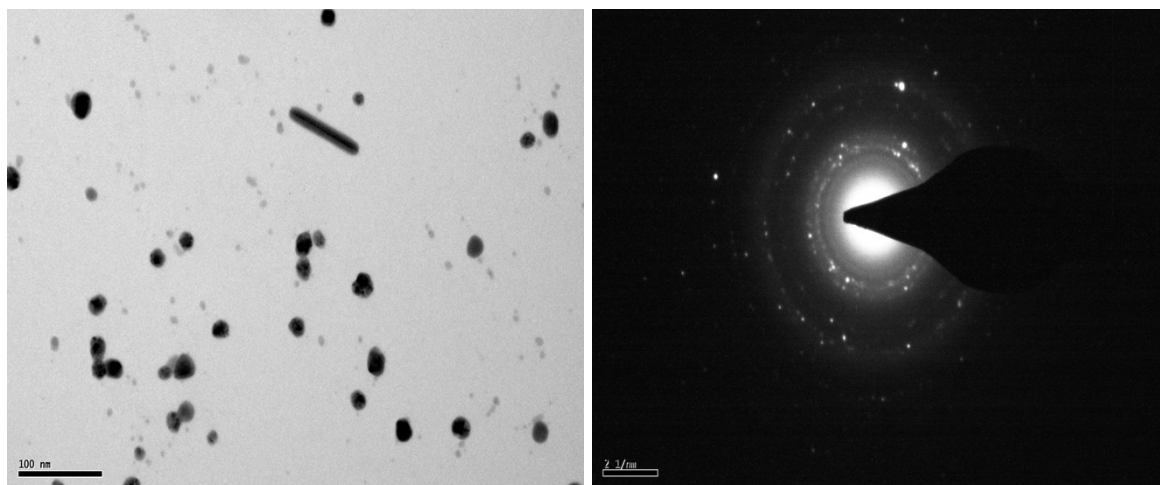

Fig. S7 Electron X-ray diffraction spectrometry (EDS) of Ru(II)-Ag hybrid nanostructures

Ru(II)-Ag I

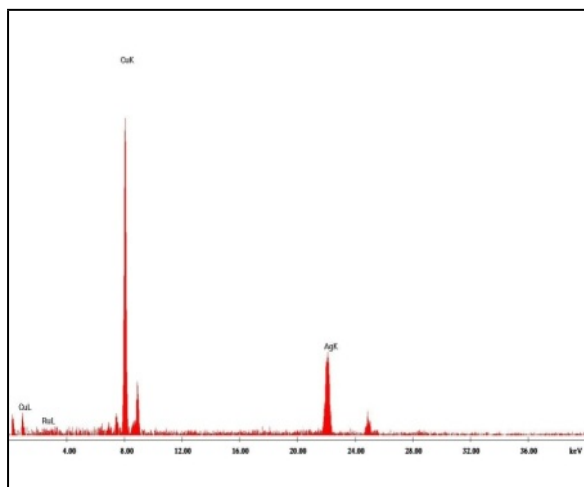

Ru(II)-Ag III

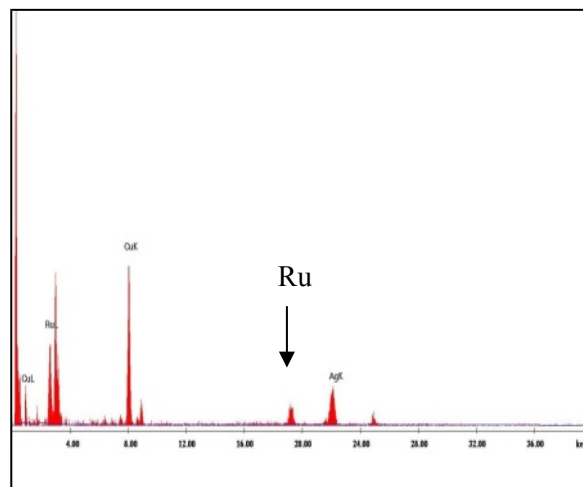

Ru-Ag IV

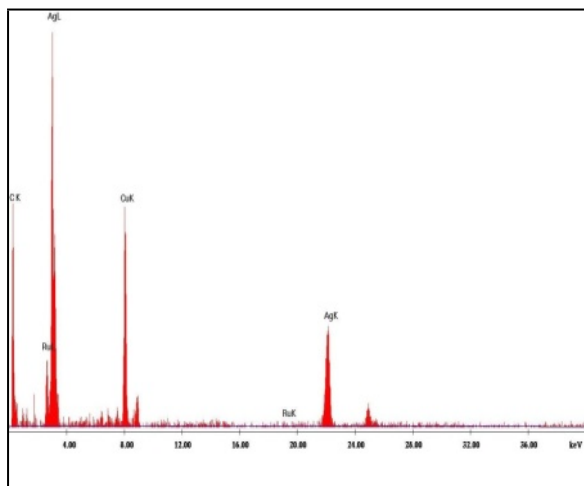

Ru(II)-Ag V

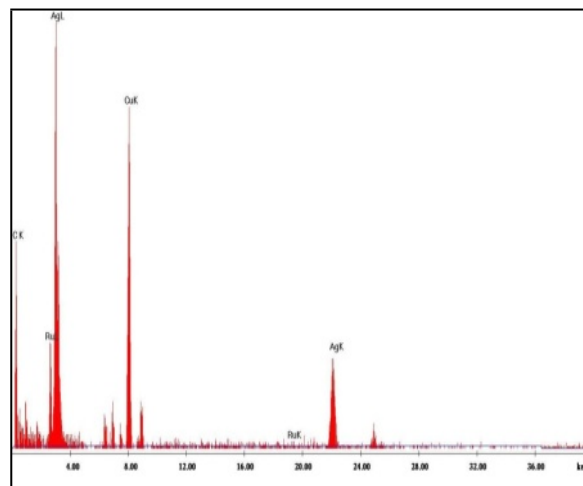

Ru(II)-Ag VI

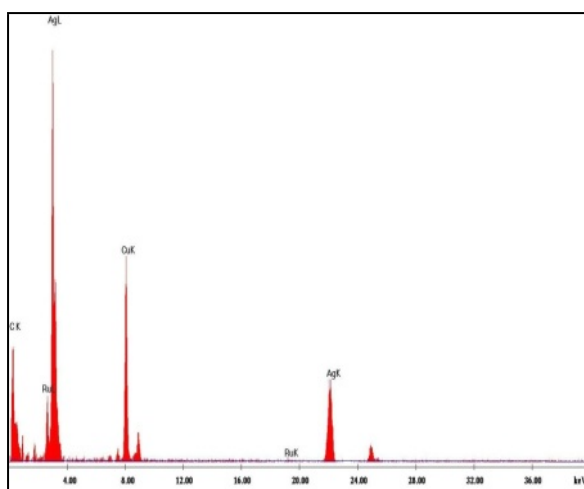

Fig. S8 SEM images of Ru(II)-Ag hybrids molar ratio = 2.0, 5.4

Ru(II)-Ag II nanostructure  
(Scale bar 4  $\mu\text{m}$ )

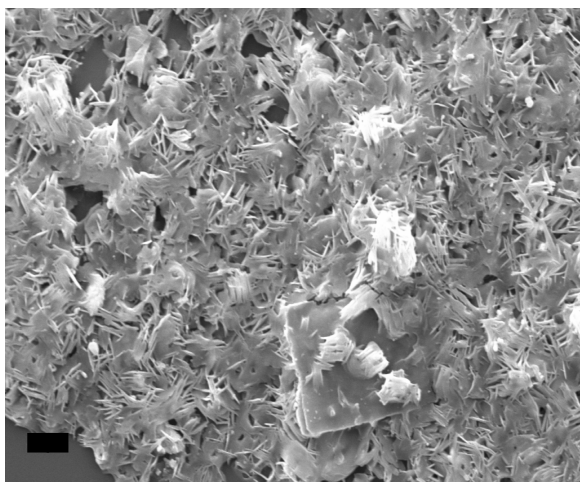

Ru(II)-Ag V HNTs  
(Scale bar 200 nm)

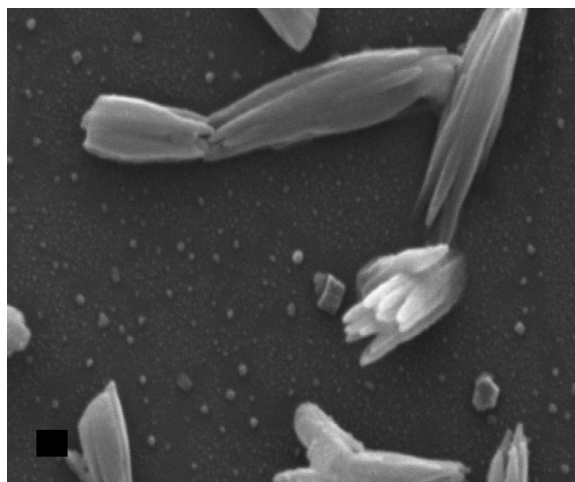

Fig. S9 Powder X-ray diffraction (PXRD) pattern of Ru(II)-Ag HNTs

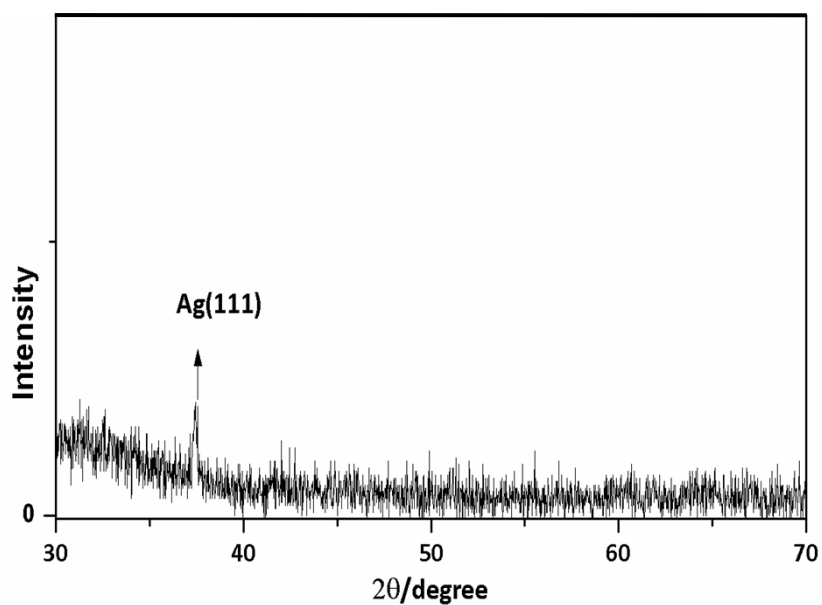

Fig. S10 UV-Vis spectra of citrate-Ag NPs

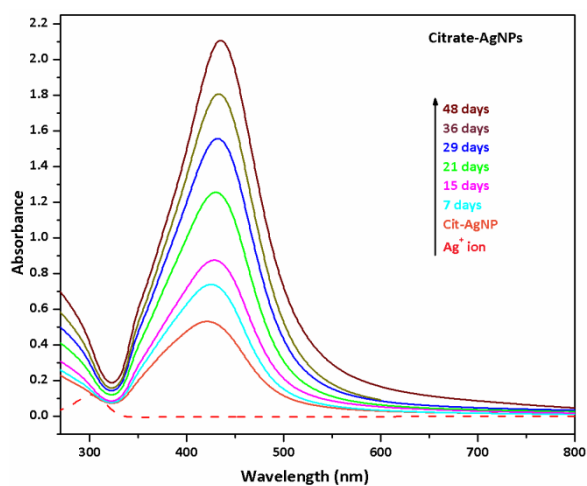

**Table S1.** Summary of experiment details and morphologies (Reaction temperature = 80°C, 24h, N<sub>2</sub>)

| AgNO <sub>3</sub><br>(mg/ mmol) | Ru(II)-<br>sensitizer (mg) | [Ag <sup>+</sup> /Ru <sup>2+</sup> ]<br>ratio | ACN: EtOH : H <sub>2</sub> O<br>(3:1:1 v/v) (ml) | Morphology observed                                        |
|---------------------------------|----------------------------|-----------------------------------------------|--------------------------------------------------|------------------------------------------------------------|
| 1.8/0.01                        | 9.6                        | 1.04                                          | 10                                               | Ag nanocomposites and hybrid misfolded sheets <sup>a</sup> |
| 3.4/0.02                        | 9.6                        | 2.0                                           | 10                                               | Nanotube cum hybrid sheets <sup>b</sup>                    |
| 5.1/0.03                        | 9.6                        | 3.1                                           | 10                                               | HNT with Ag NPs <sup>a</sup>                               |
| 6.8/0.04                        | 9.6                        | 4.2                                           | 10                                               | Long HNTs with Ag NPs <sup>a</sup>                         |
| 8.5/0.05                        | 9.6                        | 5.2                                           | 10                                               | nanotube bundles <sup>b</sup>                              |
| 10.5/0.06                       | 9.6                        | 6.4                                           | 10                                               | Wide HNTs with large Ag NPs <sup>a</sup>                   |

<sup>a</sup> Morphology assigned based on TEM micrographs<sup>b</sup> Morphology assigned based on SEM micrographs**Table S2.** Summary of EDS analysis

| [Ag <sup>+</sup> /Ru <sup>2+</sup> ] ratio | Atomic weight % |                  | Weight %        |                  |
|--------------------------------------------|-----------------|------------------|-----------------|------------------|
|                                            | Ag <sup>0</sup> | Ru <sup>2+</sup> | Ag <sup>0</sup> | Ru <sup>2+</sup> |
| 1.0                                        | 42.0            | 0.8              | 55.0            | 0.9              |
| 3.1                                        | 33.2            | 22.3             | 41.3            | 26.0             |
| 4.2                                        | 18.0            | 0.4              | 52.7            | 1.1              |
| 5.2                                        | 17.6            | 0.2              | 46.9            | 0.6              |
| 6.4                                        | 23.1            | 0.4              | 56.7            | 0.8              |
